# Supplementary material for: Contributions of Climate Change, Vegetation Growth, and Elevated Atmospheric CO2 Concentration to Variation in Water Use Efficiency in Subtropical China
Source: MDPI journal article supplement (doi:10.3390/rs14174296), 2022-08-31
Supplement: s1 [file s1]

## Supporting Materials

### Contributions of climate change, vegetation growth, and elevated atmospheric CO<sub>2</sub> concentration to variation in water use efficiency in subtropical China

This text includes supplementary figures and tables.

## Contents

### List of figures

**Figure. S1.** Comparison of GPP and ET based on FLUXNET and GLASS.

**Figure. S2.** Spatial pattern of significance of interannual trends in WUE (a), GPP (b), and ET (c) in the subtropical of China from 1982 to 2018.

**Figure. S3.** Time series of annual WUE(a), GPP (b), ET(c) in different landscapes of the subtropical of China.

**Figure. S4.** Spatial pattern of the regression coefficients for the driving factors LAI (a), Ca (b), SWC(c), VPD (d), MAT (e), MAP (f), Rg (g) in the subtropical of China.

**Figure. S5** Spatial pattern of ridge parameter “a” (a), coefficient of determination “R<sup>2</sup>” (b).

**Figure. S6** Spatial pattern of the normalized interannual trends in GPP (a), ET (b), LAI (c), Ca (d), SWC(e), VPD (f), MAT (g), MAP (h), and Rg (i) in the subtropical China from 1982 to 2018.

### List of tables

**Table. S1.** Main data.

**Table. S2.** Eddy covariance (EC) Flux sites used for model verification.

**Table. S3.** All the variables with abbreviations and explanations used in this study.

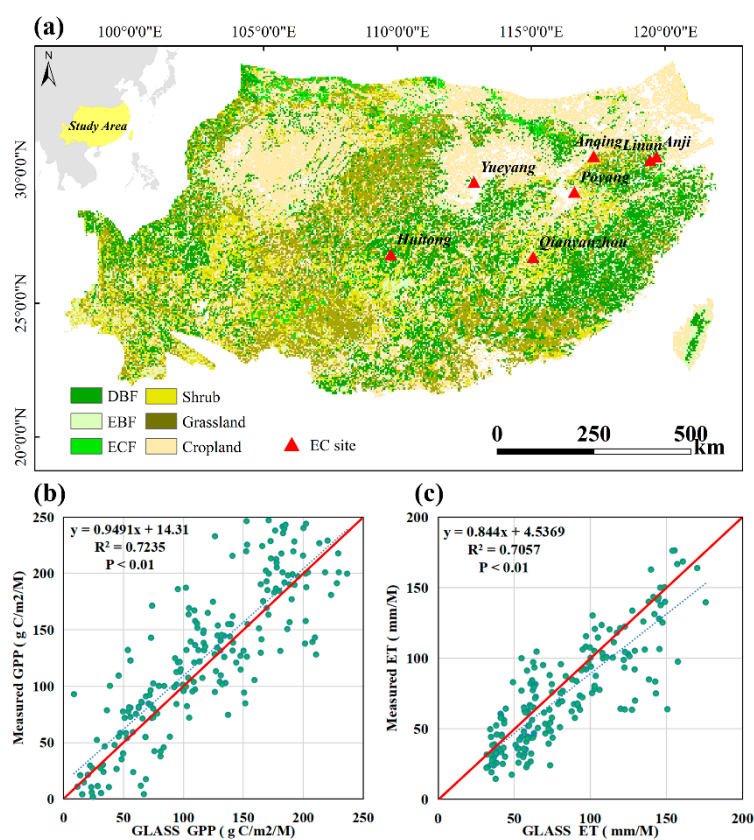

**Figure. S1.** Comparison of GPP and ET based on FLUXNET and GLASS. (a) Spatial distribution of flux towers, where the red triangle icons indicate the locations of flux towers. (b) Comparison of GPP between the two data sets; the abscissa represents the FLUXNET data, and the ordinate represents the GLASS data. (c) Comparison of ET between the two data sets. This study uses monthly data for verification, and the time span of the data is shown in Table S2.

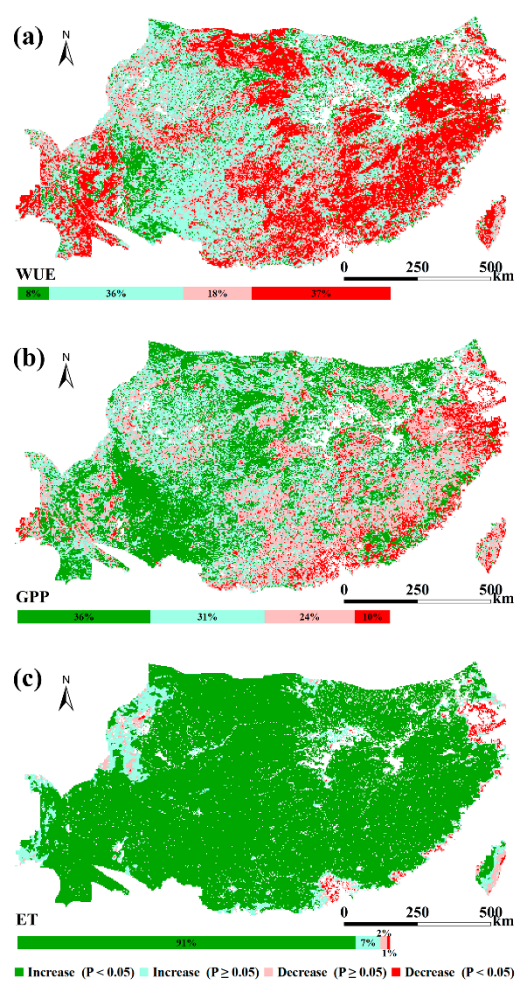

**Figure. S2.** Spatial pattern of the significant interannual trends in WUE (a), GPP (b), and ET (c) in subtropical China from 1982 to 2018.

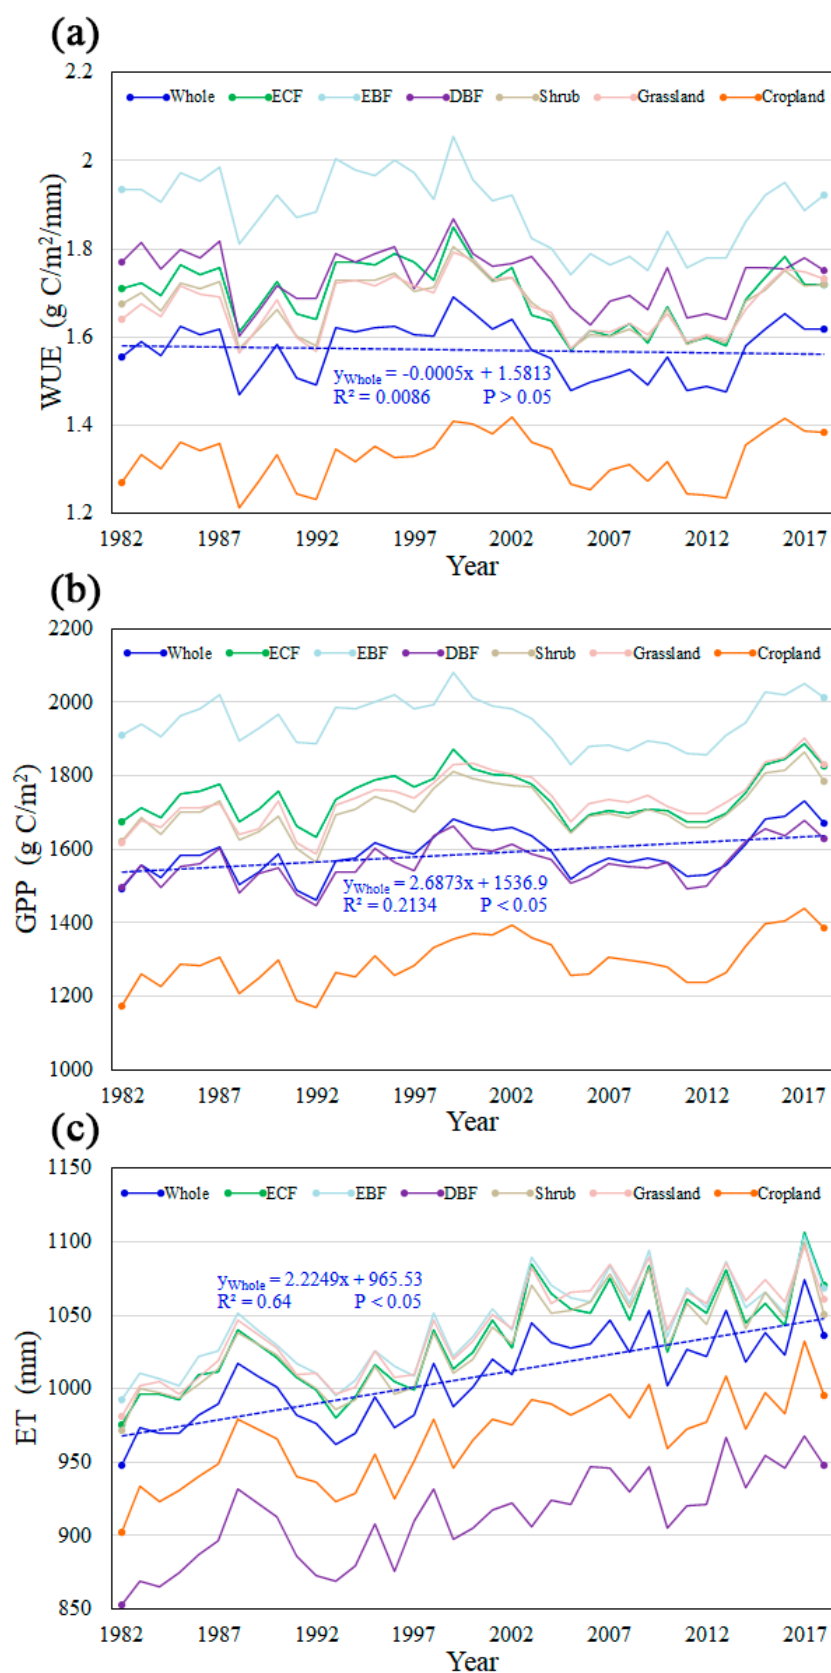

**Figure. S3.** Time series of annual WUE(a), GPP (b), ET(c) in different landscapes of the subtropical of China from 1982 to 2018.



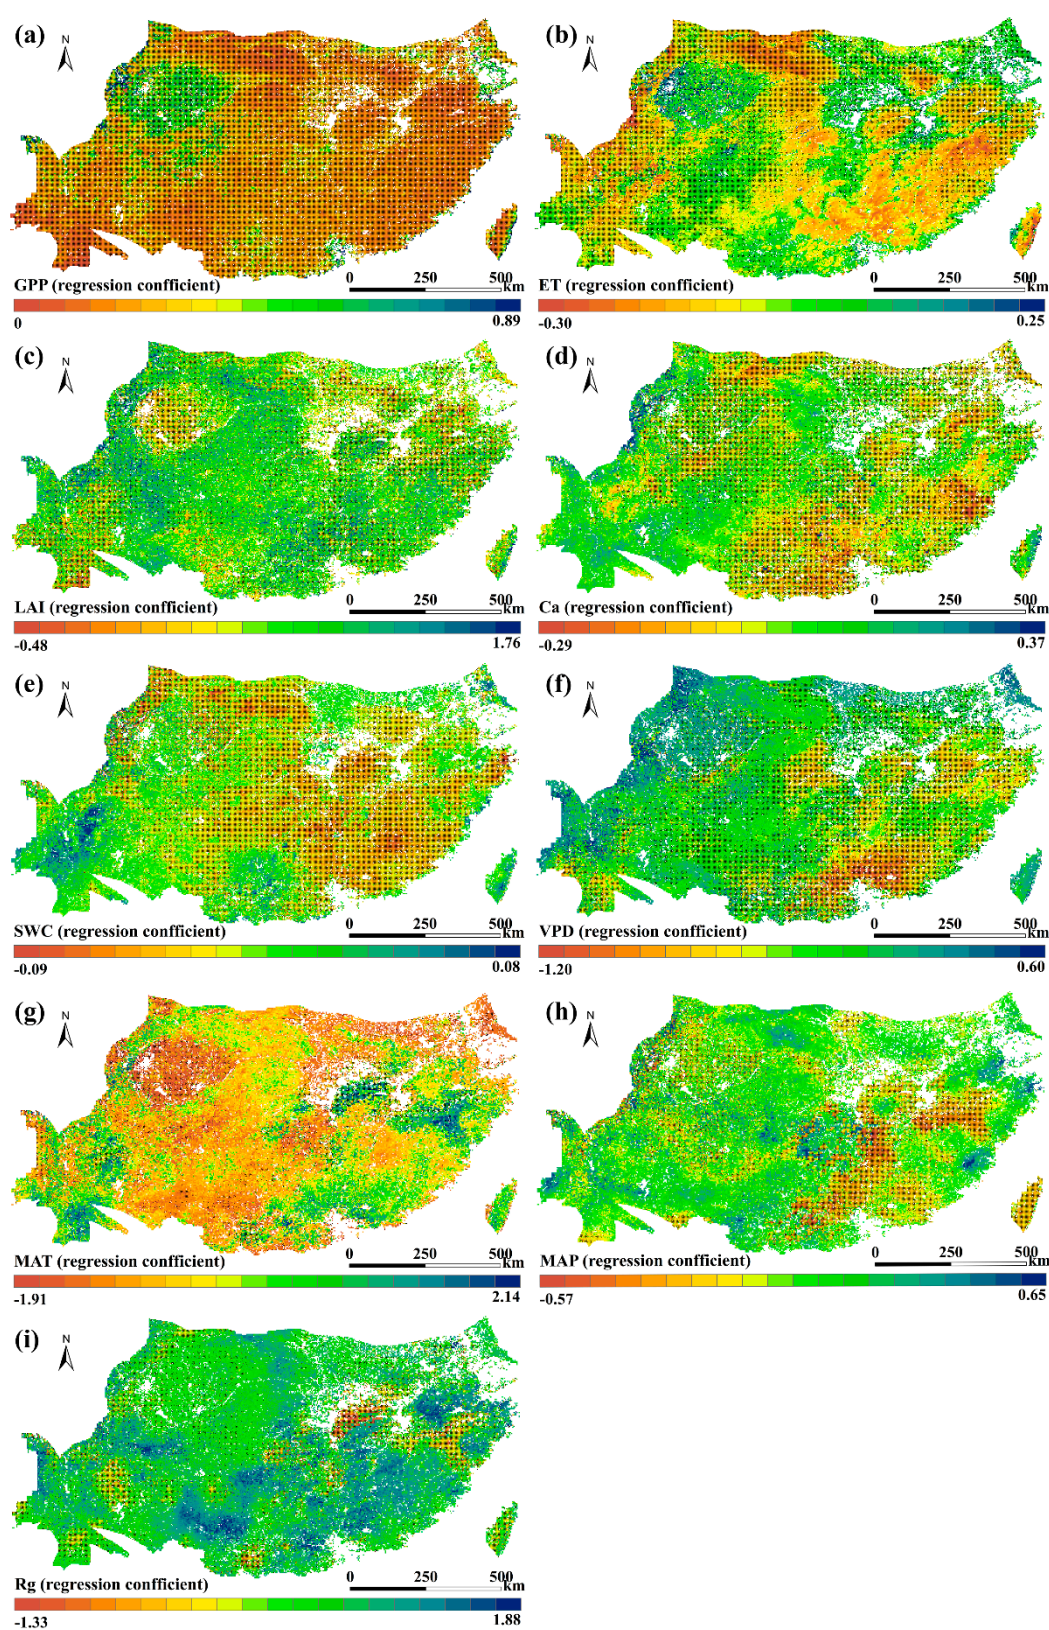

**Figure. S4.** Spatial pattern of the regression coefficients for the driving factors GPP (a), ET (b), LAI (c), Ca (d), SWC(e), VPD (f), MAT (g), MAP (h), and Rg (i) in the subtropical China. and the black dots in the figure showed the pixels that passed the  $P < 0.05$  significance level test.

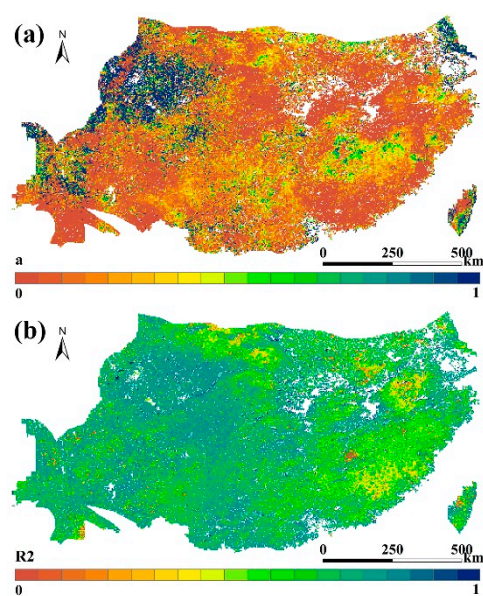

**Figure. S5.** Spatial pattern of ridge parameter “a” (a), coefficient of determination “R<sup>2</sup>” (b).

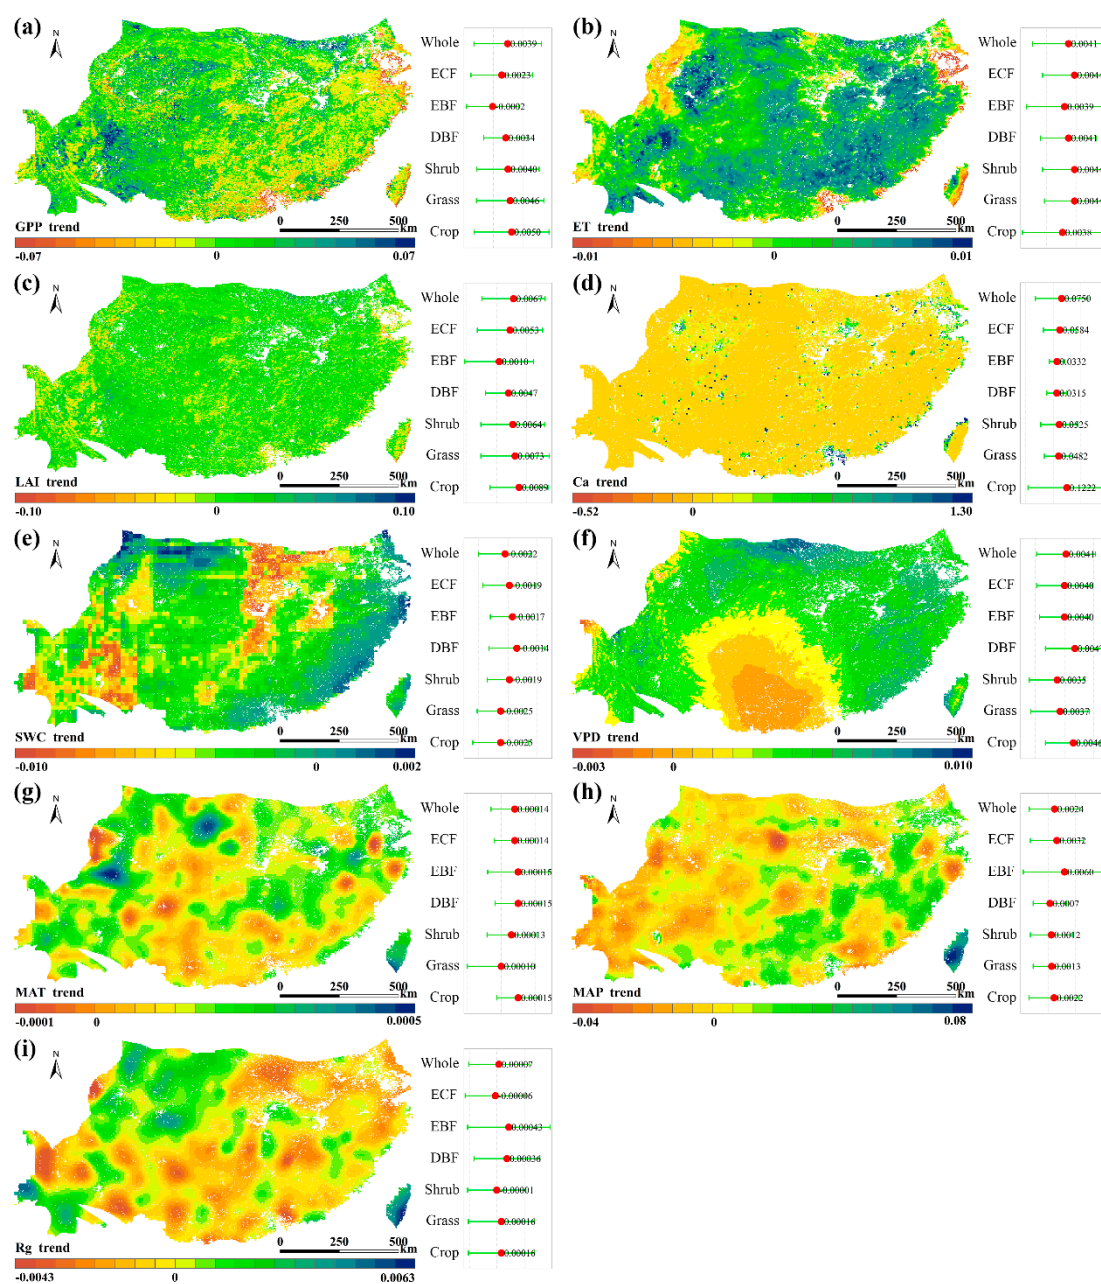

**Figure S6.** Spatial pattern of the normalized interannual trends in GPP (a), ET (b), LAI (c), Ca (d), SWC(e), VPD (f), MAT (g), MAP (h), and Rg (i) in the subtropical China from 1982 to 2018. The right insets indicate the interannual trends of different landscapes, with whiskers indicating the standard deviations of all grid cell values.



**Table. S1.** Main data.

| Data                         | Resolution    | Source                                                                                          | Site                                                                                                                          |
|------------------------------|---------------|-------------------------------------------------------------------------------------------------|-------------------------------------------------------------------------------------------------------------------------------|
| GPP                          |               |                                                                                                 |                                                                                                                               |
| ET                           | 0.05° × 0.05° | Global land surface satellite (GLASS)                                                           | <a href="http://www.geodata.cn/thematicView/GLASS">http://www.geodata.cn/thematicView/GLASS</a>                               |
| Leaf area index (LAI)        |               |                                                                                                 |                                                                                                                               |
| temperature                  |               |                                                                                                 |                                                                                                                               |
| Precipitation                |               |                                                                                                 |                                                                                                                               |
| specific humidity            | 0.1° × 0.1°   | China meteorological forcing dataset (1979–2018)                                                | <a href="http://data.tpdc.ac.cn/zh-hans">http://data.tpdc.ac.cn/zh-hans</a>                                                   |
| shortwave radiation          |               |                                                                                                 |                                                                                                                               |
| Vapor Pressure Deficit (VPD) | 1 km × 1 km   | Terra Climate: Monthly Climate and Climatic Water Balance for Global Terrestrial Surfaces – VPD | <a href="https://code.earthengine.google.com">https://code.earthengine.google.com</a>                                         |
| Soil water content (SWC)     | 0.25° × 0.25° | GLDAS Noah Land Surface Model L4 monthly 0.25 × 0.25degree V2.0                                 | <a href="https://disc.gsfc.nasa.gov/datasets/GLDAS_NOAH025_M_2.0">https://disc.gsfc.nasa.gov/datasets/GLDAS_NOAH025_M_2.0</a> |
| CO2                          | 1 km × 1 km   | Center of Global Environmental Research                                                         | <a href="https://db.cger.nies.go.jp/dataset">https://db.cger.nies.go.jp/dataset</a>                                           |
| Vegetation Types             | 1 km × 1 km   | Chinese vegetation regionalization                                                              | <a href="https://www.resdc.cn">https://www.resdc.cn</a>                                                                       |
| Climate division             | -             | China's climate division                                                                        | <a href="https://www.resdc.cn">https://www.resdc.cn</a>                                                                       |



**Table S2.** Eddy covariance (EC) Flux sites used for model verification.

|     | <b>Name</b> | <b>Lat</b> | <b>Long</b> | <b>Period</b>   | <b>References</b> |
|-----|-------------|------------|-------------|-----------------|-------------------|
| GPP | Qianyanzhou | 26.73      | 115.07      | 2003.01–2010.12 | ChinaFLUX         |
|     | Huitong     | 26.83      | 109.75      | 2008.01–2009.12 | [6]               |
|     | Yueyang     | 29.53      | 112.86      | 2005.07–2007.07 | [2]               |
|     | Anji        | 30.50      | 117.33      | 2005.07–2007.07 | [2]               |
|     | Anqing      | 30.48      | 119.67      | 2011.01–2014.12 | [1]               |
|     | Linan       | 30.35      | 119.44      | 2016.01–2016.12 | [4]               |
| ET  | Qianyanzhou | 26.73      | 115.07      | 2003.01–2010.12 | ChinaFLUX         |
|     | Huitong     | 26.83      | 109.75      | 2009.01–2009.12 | [5]               |
|     | Yueyang     | 29.53      | 112.86      | 2006.01–2006.12 | [5]               |
|     | Linan       | 30.35      | 119.44      | 2016.01–2016.12 | [4]               |
|     | Poyang      | 29.16      | 116.61      | 2013.07–2014.07 | [3]               |

**Table S3.** All the variables with abbreviations and explanations used in this study.

| <b>NO</b> | <b>Abbreviations</b> | <b>Explanations</b>                                |
|-----------|----------------------|----------------------------------------------------|
| 1         | Ca                   | Elevated atmospheric CO <sub>2</sub> concentration |
| 2         | Cli                  | Climate change                                     |
| 3         | Crop                 | Cropland                                           |
| 4         | DBF                  | Deciduous broad-leaved forest                      |
| 5         | EBF                  | Evergreen broad-leaf forest                        |
| 6         | ECF                  | Evergreen coniferous forest                        |
| 7         | ET                   | Evapotranspiration                                 |
| 8         | GEE                  | Google Earth Engine                                |
| 9         | GLASS                | Global Land Surface Satellite                      |
| 10        | GPP                  | Gross Primary Productivity                         |
| 11        | Grass                | Grassland                                          |
| 12        | LAI                  | Leaf area index                                    |
| 13        | MAP                  | Annual accumulated precipitation                   |
| 14        | MAT                  | Annual average temperature                         |
| 15        | Rg                   | Annual solar radiation                             |
| 16        | STC                  | Subtropical region of China                        |
| 17        | SWC                  | Soil water content                                 |
| 18        | VPD                  | Vapor pressure deficit                             |
| 19        | WUE                  | Water use efficiency                               |

## References

1. Chen X, Jiang H, Niu X, et al. Effect of seasonal high temperature and drought on carbon flux of bamboo forest ecosystem in subtropical region. *Chin. J. Appl. Ecol.* **2016**, *27*, 335–344.
2. Han S. *Productivity Estimation of the Poplar Plantations on the Beaches in Middle and Lower Reaches of Yangtze River Using Eddy Correlation Measurement*; Chinese Academy of Forestry: Beijing, China, 2008.
3. Rao, Z.; Liu, X.; Wang, R. Characteristics and impact factors of surface fluxes in Poyang Lake area. *Meteorol. Disaster Res. Res.* **2021**, *44*, 25–33.
4. Sun, H. The Study on Characteristics of Carbon and Water Fluxes and Energy Fluxes in Mixed Evergreen and Deciduous Broad-Leaved Forest in Tianmu Mountain. Master's Thesis, Zhejiang A&F University, Hangzhou, China, 2017.
5. Wang, Z. *Energy Balance and Water Vapor Flux of Snail Control and Schistosomiasis Prevention Forest Ecosystem in the Yangtze River Beach Land*; Chinese Academy of Forestry: Beijing, China, 2008.
6. Zhao, Z. *A Study on Carbon Flux between Chinese Fir Plantations and Atmosphere in Subtropical Belts*; Central South University of Forestry and Technology: Changsha, China, 2011.
